# CONTENTS

- 1 **Epidemiologic Evidence to Guide the Understanding and Prevention of Gun Violence.** *Daniel W. Webster, Magdalena Cerdá, Garen J. Wintemute, and Philip J. Cook*
- 5 **The Relationship Between Controlled Substances and Violence.** *Emma E. McGinty, Seema Choksy, and Garen J. Wintemute*
- 32 **Alcohol Use and Firearm Violence.** *Charles C. Branas, SeungHoon Han, and Douglas J. Wiebe*
- 46 **Association Between Substance Use and Gun-Related Behaviors.** *Danhong Chen and Li-Tzy Wu*
- 62 **Are We Missing Something Pertinent? A Bias Analysis of Unmeasured Confounding in the Firearm-Suicide Literature.** *M. Miller, S. A. Swanson, and D. Azrael*
- 70 **The Transmission of Gun and Other Weapon-Involved Violence Within Social Networks.** *Melissa Tracy, Anthony A. Braga, and Andrew V. Papachristos*
- 87 **Clinician Attitudes, Screening Practices, and Interventions to Reduce Firearm-Related Injury.** *Paul J. D. Roszko, Jonathan Ameli, Patrick M. Carter, Rebecca M. Cunningham, and Megan L. Ranney*
- 111 **Effectiveness of Interventions to Promote Safe Firearm Storage.** *Ali Rowhani-Rahbar, Joseph A. Simonetti, and Frederick P. Rivara*
- 125 **Risks and Targeted Interventions: Firearms in Intimate Partner Violence.** *April M. Zeoli, Rebecca Malinski, and Brandon Turchan*
- 140 **What Do We Know About the Association Between Firearm Legislation and Firearm-Related Injuries?** *Julian Santaella-Tenorio, Magdalena Cerdá, Andrés Villaveces, and Sandro Galea*

Instructions to Authors can be found on the following website: <http://epirev.oxfordjournals.org/>
